# Supplementary material for: Engineering Ti3C2Tx (titanium carbide) MXene-based composites and emerging applications: a mini review
Source: Royal Society of Chemistry journal article supplement (doi:10.1039/d5ra08486e), 2026-05-12
Supplement: d5ra08486e1.pdf [file d5ra08486e1.pdf]

Table S1. Comparative cost benchmarking of MAX phase precursors for MXene synthesis based on commercial pricing and stoichiometric ratios (100 g basis).<sup>1-3</sup>

| Materials                                      | Ratio                  | 100 g/USD |
|------------------------------------------------|------------------------|-----------|
| Ti <sub>3</sub> AlC <sub>2</sub>               | Ti:Al:C ~ 3:1.2:1.8    | 420.23    |
| Ti <sub>3</sub> GaC <sub>2</sub>               | Ti:Ga:C ~ 2.1:2.3:1.7  | 802.1     |
| Ti <sub>4</sub> AlN <sub>3</sub>               | Ti:Al:N ~ 50:13.5:36.5 | 209.95    |
| Ti <sub>5</sub> Al <sub>2</sub> C <sub>3</sub> | Ti:Al:C ~ 5:2.15:2.78  | 415.56    |
| Ti <sub>2</sub> InC                            | Ti:In:C ~ 2.1:2.3:1.7  | 944.62    |

Table S2. Semi-quantitative sustainability and industrial viability comparison.<sup>4-6</sup>

| Parameter                        | HF Etching | MILD     | Fluoride-Free | Halogen   | Molten Salt |
|----------------------------------|------------|----------|---------------|-----------|-------------|
| Reaction Temp                    | RT         | RT       | RT–80°C       | RT        | 550–750°C   |
| Energy Demand                    | Low        | Low      | Low–Moderate  | Low       | High        |
| Hazard Level                     | Very High  | High     | Low–Moderate  | Very High | Moderate    |
| Waste Neutralization             | Intensive  | Moderate | Low           | Intensive | Moderate    |
| Chemical Cost                    | Low        | Moderate | Moderate–High | High      | Moderate    |
| Process Complexity               | Low        | Low      | Moderate      | High      | High        |
| Estimated Industrial Scalability | Medium     | High     | Developing    | Low       | Promising   |

Table S3. Comparative overview of representative 2D materials: properties, strengths, and limitations

| Material                           | Key Physicochemical Properties                                                                                                                                                                                                                                                                                                                                                                                                                                                   | Major Strengths                                                                                                                                                                                                                                                                      | Main Limitations                                                                                                                                                                                                                          |
|------------------------------------|----------------------------------------------------------------------------------------------------------------------------------------------------------------------------------------------------------------------------------------------------------------------------------------------------------------------------------------------------------------------------------------------------------------------------------------------------------------------------------|--------------------------------------------------------------------------------------------------------------------------------------------------------------------------------------------------------------------------------------------------------------------------------------|-------------------------------------------------------------------------------------------------------------------------------------------------------------------------------------------------------------------------------------------|
| <b>MXenes</b> <sup>7-9</sup>       | <ul style="list-style-type: none"> <li>- High electrical conductivity (<math>\sim 10^3</math>–<math>10^4</math> S·cm<sup>-1</sup>), moderate thermal conductivity (<math>\sim 1</math> W·m<sup>-1</sup>·K<sup>-1</sup> for single flakes).</li> <li>- Hydrophilic surface terminations, moderate surface area (<math>\sim 20</math>–<math>50</math> m<sup>2</sup>·g<sup>-1</sup>), stability up to <math>\sim 600</math>–<math>730</math> °C depending on atmosphere.</li> </ul> | <ul style="list-style-type: none"> <li>- Tunable surface chemistry, strong catalytic activity, good photothermal conversion, excellent electronic transport, and processability;</li> <li>- Ideal for catalysis, sensing, energy storage, and environmental applications.</li> </ul> | <ul style="list-style-type: none"> <li>- Susceptible to oxidation, relatively lower mechanical strength than graphene, complex surface terminations.</li> <li>- Limited large-scale production maturity.</li> </ul>                       |
| <b>Borophene</b> <sup>10-13</sup>  | <ul style="list-style-type: none"> <li>- High electrical conductivity (<math>\sim 10^3</math> S·cm<sup>-1</sup>), good thermal conductivity (<math>\sim 100</math> W·m<sup>-1</sup>·K<sup>-1</sup>).</li> <li>- Theoretical surface area <math>\sim 1900</math> m<sup>2</sup>·g<sup>-1</sup>, high thermal stability (<math>&gt;700</math> °C).</li> </ul>                                                                                                                       | <ul style="list-style-type: none"> <li>- Unique anisotropic electronic properties, lightweight structure.</li> <li>- Promising catalytic and nanoelectronic potential, tunable band structure.</li> </ul>                                                                            | <ul style="list-style-type: none"> <li>- Chemically unstable in air, difficult and costly synthesis.</li> <li>- Poor scalability, defect sensitivity, and limited commercial readiness.</li> </ul>                                        |
| <b>Graphene</b> <sup>1,14-16</sup> | <ul style="list-style-type: none"> <li>- High electrical conductivity (<math>\sim 10^4</math> S·cm<sup>-1</sup>), very high thermal conductivity (<math>\approx 4800</math>–<math>5300</math> W·m<sup>-1</sup>·K<sup>-1</sup>).</li> <li>- Large surface area (<math>\sim 2600</math> m<sup>2</sup>·g<sup>-1</sup>), excellent thermal stability (<math>&gt;800</math> °C in inert atmosphere).</li> </ul>                                                                       | <ul style="list-style-type: none"> <li>- Outstanding charge transport, superior mechanical strength, high flexibility, chemical stability, and transparency.</li> <li>- Highly suitable for electronics, composites, and energy storage.</li> </ul>                                  | <ul style="list-style-type: none"> <li>- Low intrinsic chemical reactivity without functionalization, aggregation tendency in multilayers.</li> <li>- High production cost, defect control challenges, and scalability issues.</li> </ul> |

## References

- 1 M. A. Zaed, J. Paul, S. Aktar, J. Jacob, K. H. Tan and P. Thomas, *Energy Nexus*, 2026, **21**, 100625.
- 2 M. M. Atta and Q. Zhang, *FlatChem*, 2023, **42**, 100562.
- 3 Z. Otgonbayar, S. Yang, I. J. Kim and W. C. Oh, *Chemical Engineering Journal*, 2023, **472**, 144801.
- 4 A. Thakur and A. Kumar, *Mater. Res. Express*, 2023, **10**, 034001.
- 5 S. Sultana, M. H. Ali, S. K. Dutta, M. S. Al Mamun, S. Chakrabarty and M. K. Hasan, *Environmental Technology Reviews*, 2025, **14**, 273–309.
- 6 L. Cui, H. Huang, Y. Zheng, J. Zhang, H. Hai, K. Bian, Z. Feng, N. A. N. N. Malek, W. H. A. Kamaruddin, S. Lu, B. Xie, K. Gao, B. Wei, Y. Liu, C. Sun, H. Liu and C. Liu, *BMEMat*, 2025, **4**, e70034.
- 7 Q. X. Xia, J. Fu, J. M. Yun, R. S. Mane and K. H. Kim, *RSC Adv.*, 2017, **7**, 11000–11011.
- 8 S. Zhang, H. Wang, J. Liu and C. Bao, *Mater. Lett.*, 2020, **261**, 127098.
- 9 T. A. Oyehan, B. A. Salami, A. A. Abdulrasheed, H. U. Hambali, A. Gbadamosi, E. Valsami-Jones and T. A. Saleh, *Appl. Mater. Today*, 2023, **35**, 101993.
- 10 Z. Li, J. Sankar, P. Kumar and A. Vinu, *Advanced Science*, 2026, **13**, e17082.

- 11 A. Vincy, R. K. Srivastava, T. Das, P. Ranjan and R. Vankayala, *ACS Appl. Nano Mater.*, 2026, **9**, 2675–2692.
- 12 P. Ranjan, J. M. Lee, P. Kumar and A. Vinu, *Advanced Materials*, 2020, **32**, 2000531.
- 13 C. Hou, G. Tai, Z. Wu and J. Hao, *Chempluschem*, 2020, **85**, 2186–2196.
- 14 T. S. Sreeprasad and V. Berry, *Small*, 2013, **9**, 341–350.
- 15 S. Abrahamczyk, O. Sakreida, A. Bachmatiuk, G. S. Martynková and M. H. Rummeli, *Advanced Materials*, 2025, **38**, e13264.
- 16 A. M. Dimiev, C. E. Halbig and A. Talyzin, *Chem. Rev.*, 2026, **126**, 3055–3088.
